# Supplementary material for: Assembly of trinuclear and tetranuclear building units of Cu2+ towards two 1D magnetic systems: synthesis and magneto-structural correlations
Source: Royal Society of Chemistry journal article supplement (doi:10.1039/c2dt12511k), 2012-01-01
Supplement: c2dt12511k.pdf [file c2dt12511k.pdf]

# **Assembly of trinuclear and tetranuclear building units of $\text{Cu}^{2+}$ towards two 1D magnetic systems: Synthesis and magneto-structural correlations**

Anindita Chakraborty,<sup>a</sup> K. L. Gurunatha,<sup>a</sup> A. Muthulakshmi,<sup>a</sup> Sudipta Dutta,<sup>b</sup> Swapan K. Pati<sup>b</sup> and Tapas Kumar Maji<sup>\*a</sup>

<sup>a</sup>*Molecular Materials Laboratory, Chemistry and Physics of Materials Unit, Jawaharlal Nehru Centre for Advanced Scientific Research, Jakkur, Bangalore – 560 064, India.*

<sup>\*</sup>*E-mail: tmaji@jncasr.ac.in, Phone: +91 80 2208 2826, FAX: +91 80 2208 2766*

<sup>b</sup>*Theoretical Sciences Unit, JawaharlalNehru Centre for Advanced Scientific Research, Jakkur, Bangalore, 560 064, India*

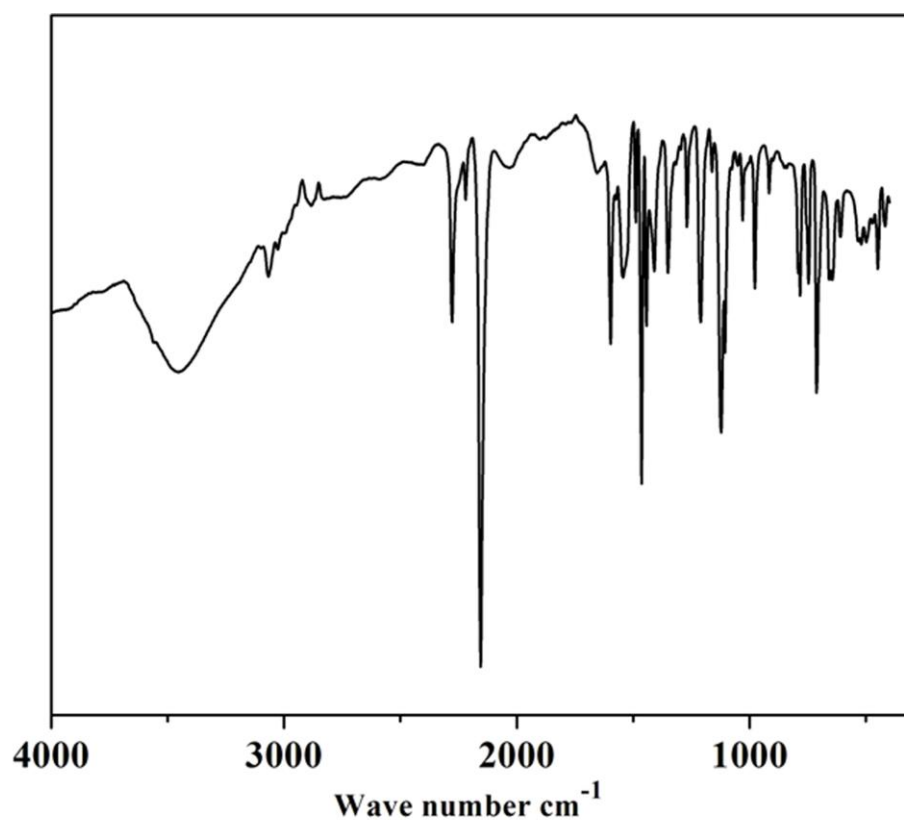

**Fig. S1** FT-IR spectra for **1**.

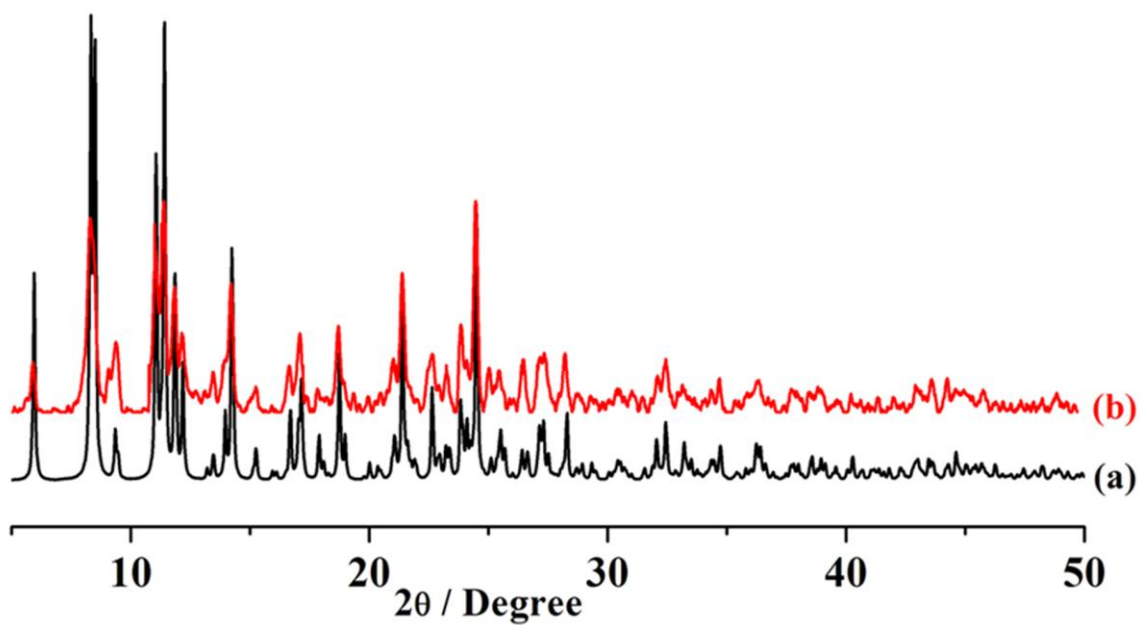

**Fig. S2** PXRD pattern of compound **1**: (a) simulated; (b) bulk as-synthesized

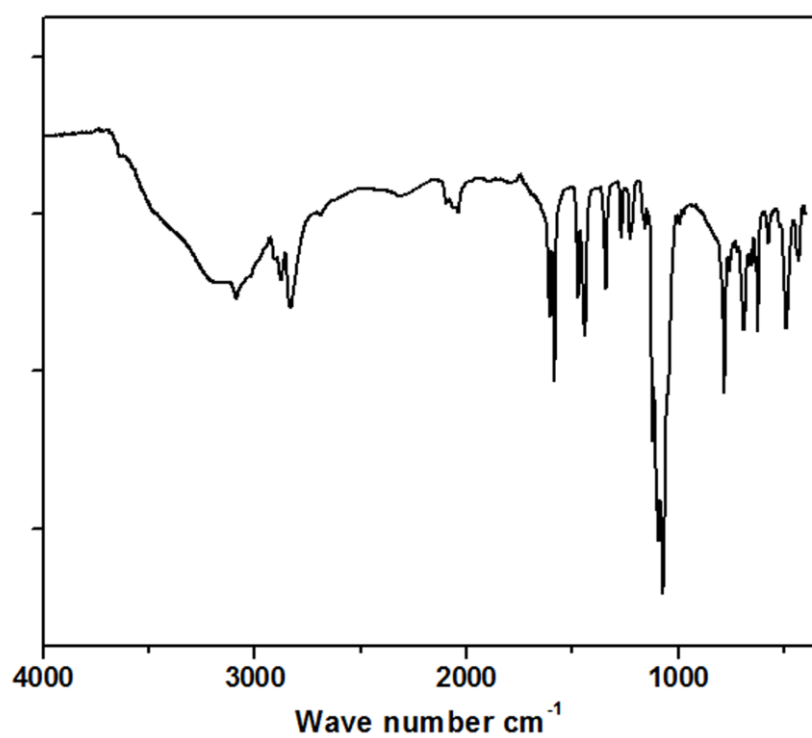

Fig. S3 FT-IR spectra for 2.

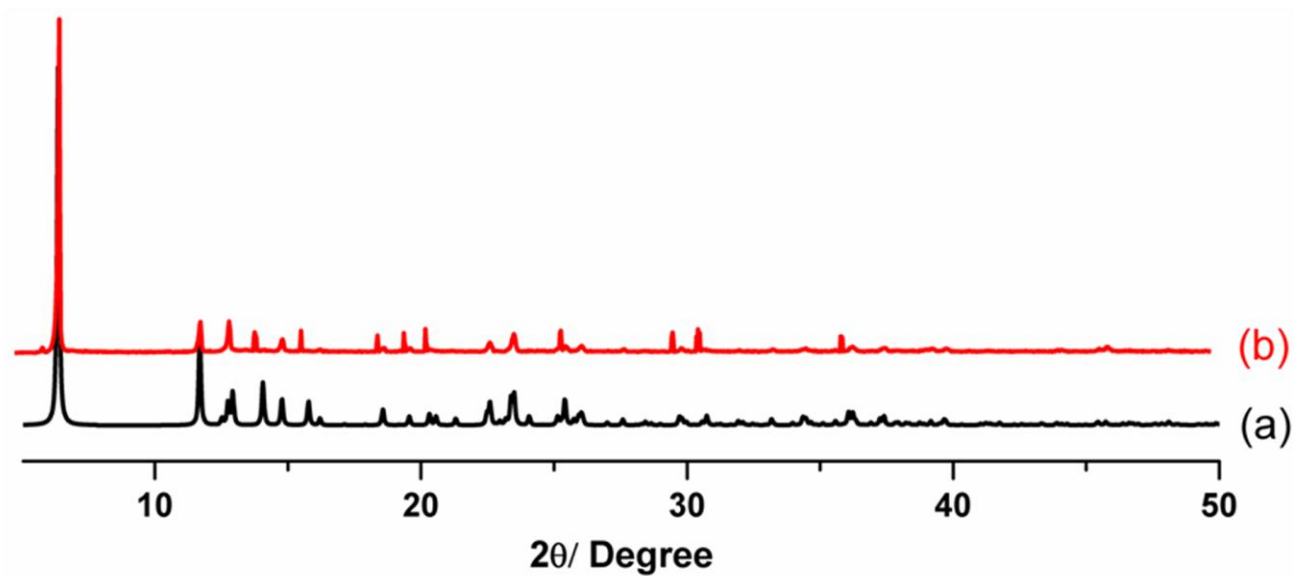

Fig. S4 PXRD pattern of compound 2: (a) simulated; (b) bulk as-synthesized

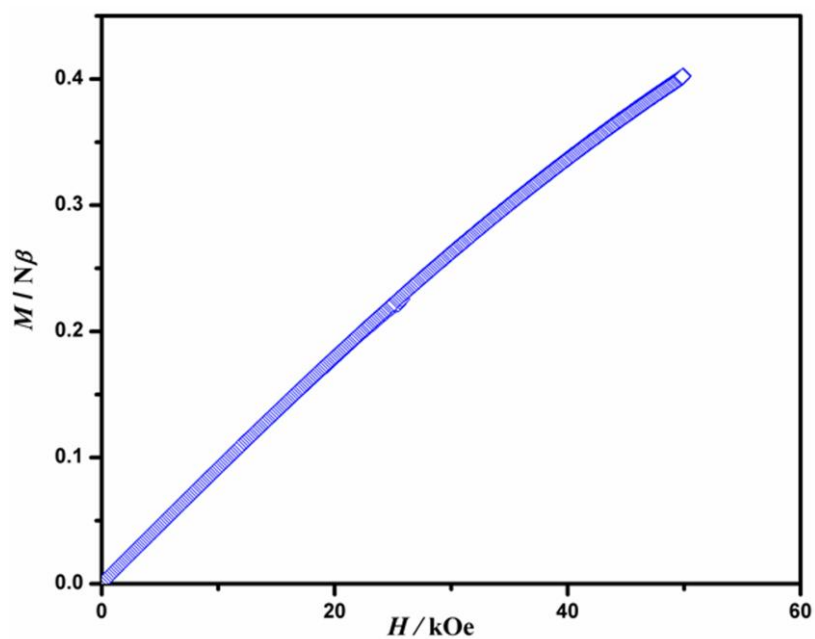

**Fig. S5** The  $M$  vs.  $H$  curve for **1** at 5 K.

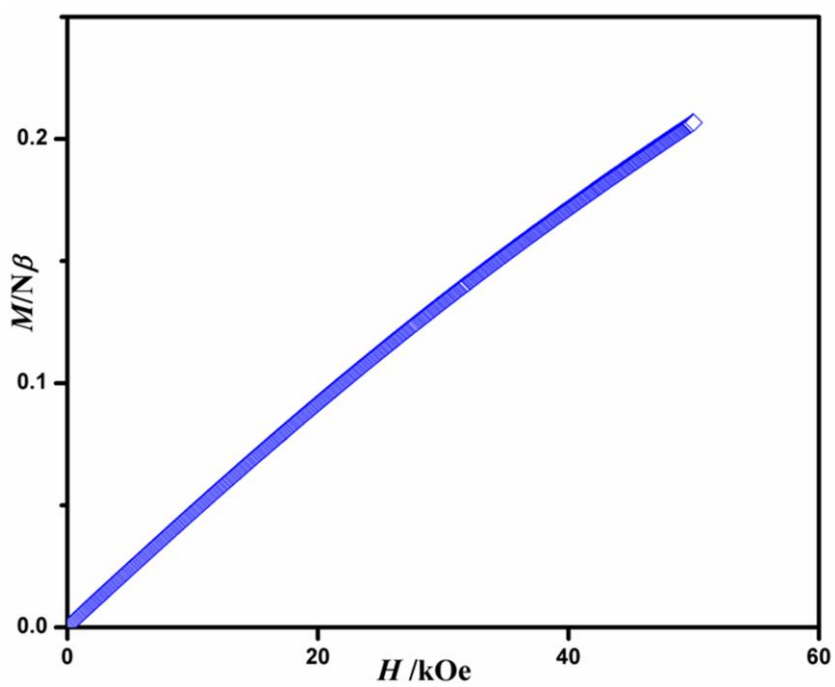

**Fig. S6** The  $M$  vs.  $H$  curve for **2** at 5 K
